# Supplementary material
Source: PubMed Central journal article supplement (PMC9901914)
Supplement: NIHMS1861794-supplement-Supporting_Information.pdf [file NIHMS1861794-supplement-Supporting_Information.pdf]

# **Sequential eDAR Isolation and FISH Identification of Rare Cells from Blood by Using Concentrated Peripheral Blood Mononuclear Cells**

Shihan Xu<sup>1,2</sup>, Li Wu<sup>2,5</sup>, Yuling Qin<sup>2,5</sup>, Yifei Jiang<sup>2</sup>, Kai Sun<sup>2</sup>, Chenee Holcomb<sup>3</sup>, Michael G. Gravett<sup>3</sup>, Lucia Vojtech<sup>3</sup>, Perry G. Schiro<sup>4</sup> and Daniel T. Chiu<sup>\*,1,2</sup>

<sup>1</sup> Department of Bioengineering, University of Washington, Seattle, United States

<sup>2</sup> Department of Chemistry, University of Washington, Seattle, United States

<sup>3</sup> Department of Obstetrics & Gynecology, University of Washington, Seattle, United States

<sup>4</sup> MiCareo Inc., Xing-Ai Road Ln. 77 No. 69 5F, Taipei City, Taiwan

<sup>5</sup> School of Public Health, Nantong University, Nantong, Jiangsu, 226019, P. R. China

\* To whom correspondence should be addressed: [chiu@uw.edu](mailto:chiu@uw.edu)

Table S1. Recovery rate of spike-in cells in PBMCs of different concentrations

Table S2. Success rate of single-cell FISH

Table S3. Improved FISH success rate by increasing denaturation temperature

**Table S1.** Recovery rate of spike-in MCF-7 cells from samples with different PBMC concentrations. In “L\_S” samples, MCF-7 cells were first labeled with PE-anti-EpCAM antibody, then spiked into PBMCs. In the “S\_L” sample, unlabeled MCF-7 cells were first spiked into a suspension of PBMCs, then labeled with PE-anti-EpCAM antibody.

| PBMCs concentration (cells/mL) | 2.5×10 <sup>7</sup> (L_S) | 5.0×10 <sup>7</sup> (L_S) | 1.0×10 <sup>8</sup> (L_S) | 2.5×10 <sup>7</sup> (S_L) |
|--------------------------------|---------------------------|---------------------------|---------------------------|---------------------------|
| MCF-7 cells spiked             | 90                        | 50                        | 350                       | 250                       |
| MCF-7 cells collected          | 80                        | 43                        | 299                       | 218                       |
| Recovery rate                  | 88.9%                     | 86.0%                     | 85.4%                     | 87.2%                     |

**Table S2.** Success rate of single-cell FISH analysis.

| Slide No. | Counted cells | Cell with FISH signals | FISH success rate |
|-----------|---------------|------------------------|-------------------|
| 1         | 100           | 80                     | 80%               |
| 2         | 100           | 65                     | 65%               |
| 3         | 25            | 16                     | 64%               |
| 4         | 17            | 12                     | 70.6%             |
| 5         | 19            | 14                     | 73.7%             |
| Total     | 261           | 187                    | 71.6%             |

**Table S3.** The success rate of FISH analysis was improved by increasing the denaturation temperature.

| Sample NO. | Temperature (°C) | FISH success rate |
|------------|------------------|-------------------|
| 1          | 74               | 72.3%             |
| 2          | 76               | 80.0%             |
| 3          | 78               | 85.7%             |
